# Supplementary material
Source: publisher figshare collection journal article supplement (https://acs.figshare.com/ndownloader/files/8351072)
Supplement: Supplementary file 1 [file 8351072]

**Supplementary Table S1**

| <b>Structural statistics for the <i>Ov</i>-GRN peptides ensemble</b> |                         |                            |
|----------------------------------------------------------------------|-------------------------|----------------------------|
|                                                                      | Ov-GRN <sub>12-34</sub> | Ov-GRN <sub>12-35_3s</sub> |
| <b>Experimental restraints</b>                                       |                         |                            |
| Interproton distance restraints                                      | 252                     | 113                        |
| <i>Intraresidue</i>                                                  | 78                      | 46                         |
| <i>Sequential</i>                                                    | 139                     | 52                         |
| <i>Medium range (i-j &lt; 5)</i>                                     | 21                      | 4                          |
| <i>Long range (i-j ≥ 5)</i>                                          | 14                      | 44                         |
| Disulfide-bond restraints                                            | 6                       | 9                          |
| Dihedral-angle restraints                                            | 14                      | 10                         |
| <b>R.m.s. deviations from mean coordinate structure (Å)</b>          |                         |                            |
| Backbone atoms                                                       | 0.32 ± 0.15             | 0.65 ± 0.2*                |
| All heavy atoms                                                      | 0.93 ± 0.27             | 1.65 ± 0.33*               |
| <b>Ramachandran Statistics</b>                                       |                         |                            |
| % in most favoured region                                            | 71.4                    | 78.2                       |
| % in additionally allowed region                                     | 28.6                    | 21.8                       |

\* RMSD for residues 12-24.

**Supplementary TableS2. CYANA target functions for the 15 possible disulfide bond connectivities present in *Ov*-GRN<sub>12-35\_3s</sub>.**

| Set Number | Disulfide bonds<br>connectivity | Average Target Function $\pm$ SD |
|------------|---------------------------------|----------------------------------|
| 1          | 1-14, 8-23,15-24                | *0.016 $\pm$ 0.003               |
| 2          | 1-14, 8-24, 15-23               | 3.08 $\pm$ 0.18                  |
| 3          | 1-14, 8-15, 23-24               | 3.59 $\pm$ 0.15                  |
| 4          | 1-8, 14-23, 15-24               | 3.72 $\pm$ 0.02                  |
| 5          | 1-8, 14-15, 23-24               | 5.71 $\pm$ 0.32                  |
| 6          | 1-8, 14-24, 15-23               | 5.21 $\pm$ 0.25                  |
| 7          | 1-15, 8-14, 23-24               | 3.31 $\pm$ 0.04                  |
| 8          | 1-15, 8-23, 14-24               | 1.58 $\pm$ 0.37                  |
| 9          | 1-15, 8-24, 14-23               | 1.28 $\pm$ 0.2                   |
| 10         | 1-23, 8-14, 15-24               | *0.018 $\pm$ 0.01                |
| 11         | 1-23, 8-15, 14-24               | 0.32 $\pm$ 0.05                  |
| 12         | 1-23, 8-24, 14-15               | 2.53 $\pm$ 0.23                  |
| 13         | 1-24, 8-14, 15-23               | 2.61 $\pm$ 0.11                  |
| 14         | 1-24, 8-15, 14-23               | 1.18 $\pm$ 0.12                  |
| 15         | 1-24, 8-23, 14-15               | 2.49 $\pm$ 0.29                  |

\*The two connectivities with the lowest target functions are highlighted with an asterisk. The connectivity corresponding to Set Number 1 has the lowest target function indicating that the distance and angle restraints satisfy this connectivity better than the other connectivities, and it is therefore the most likely connectivity present in *Ov*-GRN<sub>12-35\_3s</sub>.

## Supplementary Figure S1

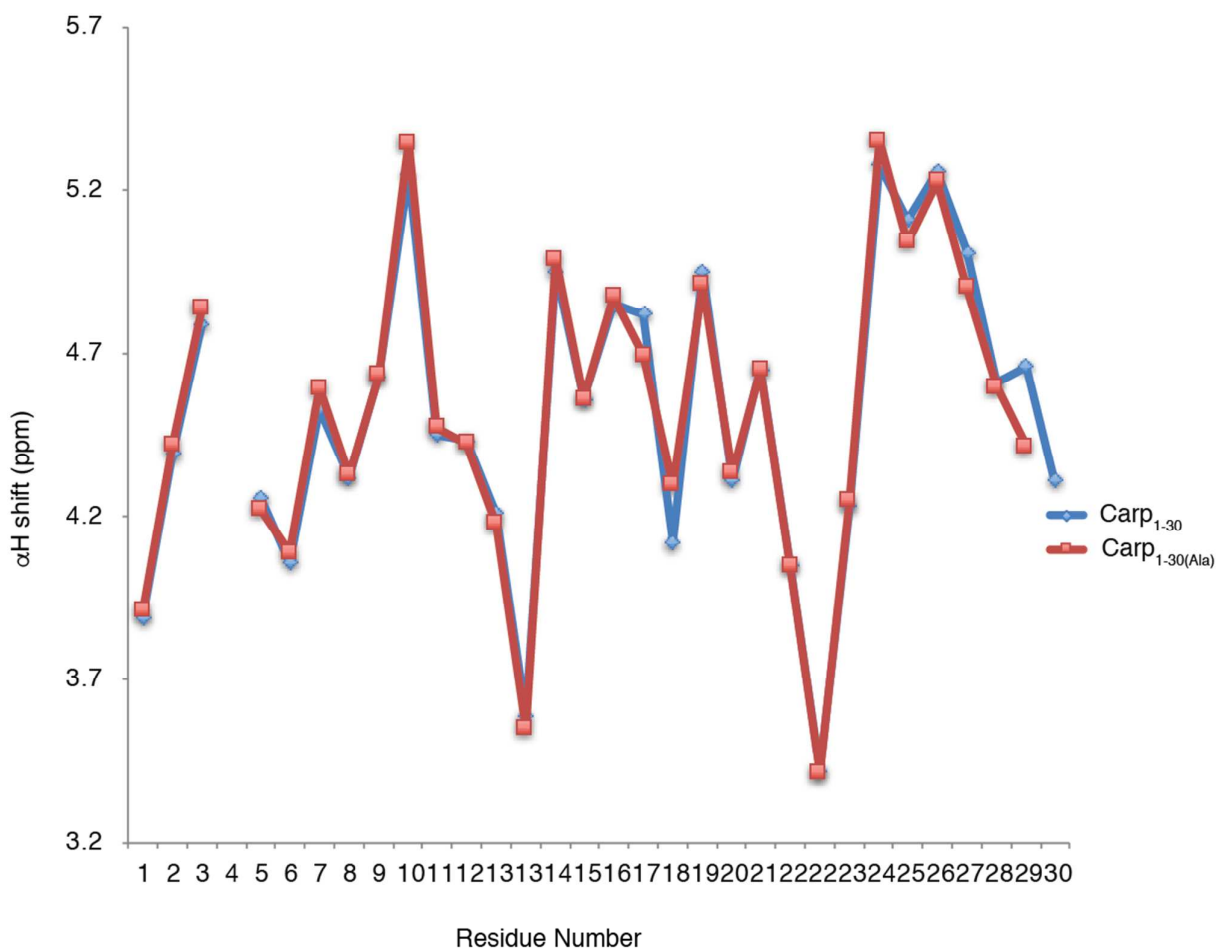

Chemical shift comparison between the published shifts of a truncated form of Carp granulin[1] and the mutant with C17A and C27A mutations.

## References

1. Vranken, W.F., Chen, Z.G., Xu, P., James, S., Bennett, H.P., and Ni, F. (1999). A 30-residue fragment of the carp granulin-1 protein folds into a stack of two beta-hairpins similar to that found in the native protein. *J. Pept. Res.* 53: 590-597.

## Supplementary Figure S2

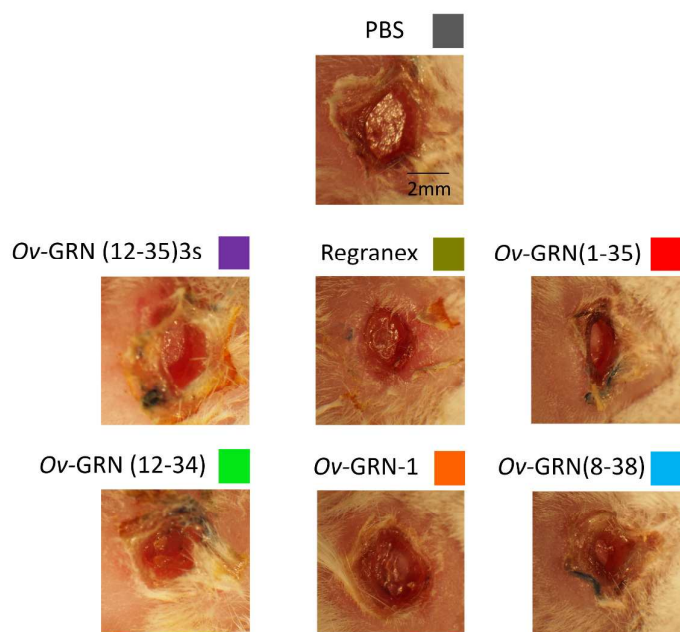

**Supplementary Figure S2: Mouse wound healing day 4 images.** Representative images from mouse wound healing study presented in Figure 5. Wound healing outcomes from treatments with 56 pmoles of recombinant *Ov*-GRN-1, *Ov*-GRN-1 peptides, unrelated peptide, thioredoxin (TRX) protein controls and 71 pmoles Regranex in 1.5% methylcellulose gel applied daily in 50  $\mu$ l volume from days 0-4 to a  $\sim 0.2$  cm<sup>2</sup> wound arising from biopsy punch to the scalp between the ears. The treatment colors are maintained across Figures 2-5.
